# Supplementary material
Source: PubMed Central journal article supplement (PMC6536916)
Supplement: awz102_supplementary_data.pdf [file awz102_supplementary_data.pdf]

**Supplementary Table 1: Clinical details of FAHN/SPG35 cases including neurophysiology and MRI findings**

| Family-#                                                 | F1                                      | F2                          | F3-1                | F3-2        | F4                                      |
|----------------------------------------------------------|-----------------------------------------|-----------------------------|---------------------|-------------|-----------------------------------------|
| <b>ethnicity</b>                                         | Serbian                                 | German                      | Cypriot             | Cypriot     | Turkish                                 |
| <b>sex</b>                                               | m                                       | f                           | m                   | f           | m                                       |
| <b>consanguinity</b>                                     | -                                       | -                           | +                   | +           | +                                       |
| <b>mutation</b>                                          | W176* (hom)<br>pat. UPD                 | G303V / P323L               | P148L (hom)         | P148L (hom) | A54Tfs*42 (hom)                         |
| <b>age at onset [y]</b>                                  | 3                                       | 3                           | 4                   | 4           | 3                                       |
| <b>age at wheelchair use [y]</b>                         | 10                                      | 6                           | i.m.                | i.m.        | 15                                      |
| <b>age at exam [y]</b>                                   | 12                                      | 23                          | 5                   | 10          | 19                                      |
| <b>cognitive deficits</b>                                | moderate to severe                      | moderate to severe          | i.m.                | i.m.        | severe                                  |
| <b>progression CD</b>                                    | +                                       | +                           | i.m.                | i.m.        | +                                       |
| <b>optic atrophy</b>                                     | -                                       | +                           | +                   | +           | i.m.                                    |
| <b>saccadic smooth pursuit</b>                           | +                                       | +                           | +                   | +           | +                                       |
| <b>gaze evoked nystagmus</b>                             | -                                       | +                           | i.m.                | i.m.        | +                                       |
| <b>slow horizontal prosaccades</b>                       | +                                       | +                           | i.m.                | i.m.        | +                                       |
| <b>other oculom. disturb.</b>                            | exotropia                               | exotropia                   | vertical gaze palsy | i.m.        | exotropia                               |
| <b>dysarthria</b>                                        | pseudob.                                | cerebellar                  | +                   | i.m.        | pseudob. & cerebellar                   |
| <b>dysphagia</b>                                         | +                                       | +                           | +                   | i.m.        | +                                       |
| <b>spasticity (UL/LL)</b>                                | + / +                                   | + / +                       | i.m.                | i.m. / +    | + / +                                   |
| <b>weakness (UL/LL/T)</b>                                | + / + / +                               | - / + / +                   | i.m.                | - / + / -   | - / + / i.m.                            |
| <b>muscle atrophy</b>                                    | none                                    | LL                          | i.m.                | i.m.        | LL                                      |
| <b>incr. DTR</b>                                         | UL/LL                                   | UL/LL                       | i.m.                | LL          | UL/LL                                   |
| <b>extensor plantar response</b>                         | +                                       | +                           | i.m.                | +           | +                                       |
| <b>limb ataxia</b>                                       | UL/LL                                   | UL/LL                       | LL                  | i.m.        | UL / LL n.a. (weakness)                 |
| <b>extrapyramidal involvement</b>                        | rigidity                                | rigidity, gen. dystonia     | i.m.                | i.m.        | i.m.                                    |
| <b>sensory deficits</b>                                  | none                                    | temp. and pinprick.         | i.m.                | i.m.        | LL distal pallhyp.                      |
| <b>urinary dysfunction</b>                               | urge                                    | voiding                     | i.m.                | i.m.        | urge, incont.                           |
| <b>rectal dysfunction</b>                                | none                                    | none                        | i.m.                | i.m.        | none                                    |
| <b>others</b>                                            | none                                    | epilepsy                    | none                | none        | abnormal outer ears                     |
| <b>Neurophysiology</b>                                   | F1                                      | F2                          | F3-1                | F3-2        | F4                                      |
| <b>MEPs (UL/LL)</b>                                      | n.d. / absent                           | normal/normal               | n.d.                | n.d.        | absent/absent                           |
| <b>SEPs (UL/LL)</b>                                      | n.d.                                    | normal/normal               | n.d.                | n.d.        | n.d.                                    |
| <b>VEPs</b>                                              | n.d.                                    | normal                      | normal              | n.d.        | n.d.                                    |
| <b>BAEPs</b>                                             | n.d.                                    | normal                      | n.d.                | n.d.        | n.d.                                    |
| <b>EMG</b>                                               | normal                                  | normal                      | normal              | n.d.        | n.d.                                    |
| <b>nerve conduction studies</b>                          | sensory-motor PNP                       | normal                      | n.d.                | n.d.        | sensory-motor PNP                       |
| <b>MRI</b>                                               | F1                                      | F2                          | F3-1                | F3-2        | F4                                      |
| <b>year of imaging / age</b>                             | 2012 / 11y                              | 2011 / 11y                  | no images           | no images   | 2013 / 19y                              |
| <b>thin corpus callosum</b>                              | + (global)                              | + (global)                  |                     |             | + (global)                              |
| <b>cerebral atrophy</b>                                  | mild parietal                           | global, most prom. parietal |                     |             | -                                       |
| <b>cerebellar atrophy (hemispheres / vermis)</b>         | + / mild                                | + / +                       |                     |             | + / +                                   |
| <b>midbrain / pons atrophy (Am/AP in mm<sup>2</sup>)</b> | - (115) / + (395)                       | - (92) / + (304)            |                     |             | - (92) / + (301)                        |
| <b>white matter changes (WMC)</b>                        | periventr., most prominent parieto-occ. | periventr.                  |                     |             | periventr., most prominent parieto-occ. |
| <b>globus pallidum hypointensity (T2 / T2*)</b>          | mild / n.d.                             | + / -                       |                     |             | - / n.d.                                |

| Family-#                                               | F5                                                                  | F6            | F7                                             | F8                                          | F9                                         |
|--------------------------------------------------------|---------------------------------------------------------------------|---------------|------------------------------------------------|---------------------------------------------|--------------------------------------------|
| ethnicity                                              | Kosovar                                                             | Italian       | German                                         | German                                      | German                                     |
| sex                                                    | f                                                                   | f             | m                                              | m                                           | m                                          |
| consanguinity                                          | -                                                                   | i.m.          | -                                              | -                                           | -                                          |
| mutation                                               | Y170* (hom)                                                         | T207M / R235H | R235H / C287R                                  | P44Q (hom)<br><b>pat. UPD</b>               | E78K / H319R                               |
| age at onset [y]                                       | 4                                                                   | i.m.          | 2,5                                            | 4                                           | 20                                         |
| age at wheelchair use [y]                              | n.a.                                                                | i.m.          | 6                                              | 7                                           | n.a.                                       |
| age at exam [y]                                        | 7                                                                   | i.m.          | 10                                             | 9                                           | 29                                         |
| cognitive deficits                                     | mild to moderate                                                    | i.m.          | started mild                                   | no deficits                                 | mild                                       |
| progression CD                                         | +                                                                   | i.m.          | + (at 5y)                                      | -                                           | -                                          |
| optic atrophy                                          | -                                                                   | i.m.          | i.m.                                           | -                                           | i.m.                                       |
| saccadic smooth pursuit                                | +                                                                   | i.m.          | +                                              | +                                           | +                                          |
| gaze evoked nystagmus                                  | -                                                                   | i.m.          | -                                              | +                                           | -                                          |
| slow horizontal prosaccades                            | -                                                                   | i.m.          | +                                              | +                                           | i.m.                                       |
| other oculom. disturb.                                 | none                                                                | i.m.          | exotropia                                      | exotropia                                   | exotropia                                  |
| dysarthria                                             | cerebellar                                                          | i.m.          | anarthria                                      | pseudob.                                    | cerebellar ><br>pseudob.                   |
| dysphagia                                              | -                                                                   | i.m.          | +                                              | +                                           | -                                          |
| spasticity (UL/LL)                                     | -/+                                                                 | i.m.          | +/+                                            | + / +                                       | + / +                                      |
| weakness (UL/LL/T)                                     | -/+ / +                                                             | i.m.          | -/+ / +                                        | -/+ / +                                     | - / - / -                                  |
| muscle atrophy                                         | none                                                                | i.m.          | LL                                             | none                                        | none                                       |
| incr. DTR                                              | UL/LL                                                               | i.m.          | UL/LL                                          | UL/LL                                       | UL/LL                                      |
| extensor plantar response                              | +                                                                   | i.m.          | +                                              | +                                           | +                                          |
| limb ataxia                                            | none                                                                | i.m.          | UL/LL                                          | UL/LL n.a.<br>(weakness)                    | UL/LL                                      |
| extrapyramidal involvement                             | resting tremor                                                      | i.m.          | gen. dystonia                                  | rigidity                                    | rigidity                                   |
| sensory deficits                                       | touch                                                               | i.m.          | none                                           | temp. and<br>pinprick.                      | none                                       |
| urinary dysfunction                                    | urge, incont.                                                       | i.m.          | voiding                                        | incont., voiding                            | urge, voiding                              |
| rectal dysfunction                                     | none                                                                | i.m.          | none                                           | none                                        | none                                       |
| others                                                 | hyperopia (6dpt)<br>&<br>behavioural and<br>psychiatric<br>symptoms | none          | epilepsy<br><br>occulomotor<br>apraxia         | regular school,<br>no formal IQ<br>testing. | none                                       |
| Neurophysiology                                        | F5                                                                  | F6            | F7                                             | F8                                          | F9                                         |
| MEPs (UL/LL)                                           | n.d.                                                                | n.d.          | normal / n.d.                                  | normal/absent                               | normal/absent                              |
| SEPs (UL/LL)                                           | n.d.                                                                | n.d.          | n.d. / normal                                  | n.d./ prol.                                 | n.d. / normal                              |
| VEPs                                                   | n.d.                                                                | n.d.          | prol.                                          | prol.                                       | n.d.                                       |
| BAEPs                                                  | n.d.                                                                | n.d.          | n.d.                                           | normal                                      | n.d.                                       |
| EMG                                                    | n.d.                                                                | n.d.          | n.d.                                           | n.d.                                        | n.d.                                       |
| Nerve conduction studies                               | normal                                                              | n.d.          | normal                                         | normal                                      | normal                                     |
| MRI                                                    | F5                                                                  | F6            | F7                                             | F8                                          | F9                                         |
| year of imaging / age                                  | 2014 / 7y                                                           | no images     | 2011 / 7y                                      | 2014 / 9y                                   | 2008 / 27y                                 |
| thin corpus callosum                                   | +                                                                   |               | +                                              | -                                           | mild parietal                              |
| cerebral atrophy                                       | -                                                                   |               | mild parietal                                  | -                                           | mild parietal                              |
| cerebellar atrophy<br>(hemispheres /vermis)            | mild / mild                                                         |               | + / +                                          | mild / -                                    | + / +                                      |
| midbrain / pons atrophy<br>(Am/AP in mm <sup>2</sup> ) | - (134) / + (349)                                                   |               | - (94) / + (339)                               | - (127) / -(440)                            | - (128) / + (380)                          |
| white matter changes                                   | mild periventr.,<br>most prom.<br>parieto-occ.                      |               | mild periventr.,<br>most prom.<br>parieto-occ. | periventr., most<br>prom. parieto-<br>occ.  | periventr., most<br>prom. parieto-<br>occ. |
| globus pallidum<br>hypointensity (T2 / T2*)            | + / n.d.                                                            |               | mild / -                                       | mild / -                                    | - / n.d.                                   |

| Family-#                                                 | F10                                                                                       | F11                                                                                                                  | F12-1                                         | F12-2           | F12-3          |
|----------------------------------------------------------|-------------------------------------------------------------------------------------------|----------------------------------------------------------------------------------------------------------------------|-----------------------------------------------|-----------------|----------------|
| <b>ethnicity</b>                                         | German                                                                                    | Belgian                                                                                                              | Belgian                                       | Belgian         | Belgian        |
| <b>sex</b>                                               | f                                                                                         | f                                                                                                                    | f                                             | f               | f              |
| <b>consanguinity</b>                                     | -                                                                                         | -                                                                                                                    | -                                             | -               | -              |
| <b>mutation</b>                                          | G45W (hom)<br><b>seg. mat. UPD</b>                                                        | A54Tfs*42/V168<br>Gfs*72                                                                                             | A8Pfs*91 (hom)                                | A8Pfs*91 (hom)  | A8Pfs*91 (hom) |
| <b>age at onset [y]</b>                                  | 4,5                                                                                       | 3                                                                                                                    | 4,5                                           | 4,5             | 4,5            |
| <b>age at wheelchair use [y]</b>                         | 7                                                                                         | 10                                                                                                                   | 9                                             | 7               | -              |
| <b>age at exam [y]</b>                                   | 7                                                                                         | 34                                                                                                                   | 9                                             | 7               | 4,5            |
| <b>cognitive deficits</b>                                | mild                                                                                      | moderate to<br>severe                                                                                                | mild                                          | mild            | -              |
| <b>progression CD</b>                                    | +                                                                                         | + (at 5y)                                                                                                            | +                                             | +               | -              |
| <b>optic atrophy</b>                                     | -                                                                                         | -                                                                                                                    | -                                             | i.m.            | i.m.           |
| <b>saccadic smooth pursuit</b>                           | +                                                                                         | +                                                                                                                    | i.m.                                          | -               | i.m.           |
| <b>gaze evoked nystagmus</b>                             | +                                                                                         | -                                                                                                                    | -                                             | -               | i.m.           |
| <b>slow horizontal prosaccades</b>                       | -                                                                                         | n.a. at 34y                                                                                                          | +                                             | -               | -              |
| <b>other oculom. disturb.</b>                            | exotropia                                                                                 | exotropia                                                                                                            | none                                          | i.m.            | i.m.           |
| <b>dysarthria</b>                                        | pseudobub.+<br>cerebellar                                                                 | cereb. 14y,<br>anarth. 34y                                                                                           | + (slow speech)                               | + (slow speech) | -              |
| <b>dysphagia</b>                                         | +                                                                                         | + (PEG at 29y)                                                                                                       | +                                             | -               | -              |
| <b>spasticity (UL/LL)</b>                                | + /+                                                                                      | +/+                                                                                                                  | +/+                                           | +/+             | -/+            |
| <b>weakness (UL/LL/T)</b>                                | +/+/+                                                                                     | +/+/+                                                                                                                | +/+/+                                         | +/+/+           | i.m.           |
| <b>muscle atrophy</b>                                    | none                                                                                      | UL/LL                                                                                                                | none                                          | none            | none           |
| <b>incr. DTR</b>                                         | UL/LL                                                                                     | UL/LL                                                                                                                | LL                                            | LL              | LL             |
| <b>extensor plantar response</b>                         | +                                                                                         | +                                                                                                                    | +                                             | +               | +              |
| <b>limb ataxia</b>                                       | UL/LL                                                                                     | UL/LL n.a.                                                                                                           | none                                          | none            | none           |
| <b>extrapyramidal involvement</b>                        | none                                                                                      | dystonic<br>posturing feet at<br>9y                                                                                  | none                                          | none            | none           |
| <b>sensory deficits</b>                                  | none                                                                                      | none as child                                                                                                        | none                                          | none            | none           |
| <b>urinary dysfunction</b>                               | urge, voiding                                                                             | incont.                                                                                                              | none                                          | none            | none           |
| <b>rectal dysfunction</b>                                | none                                                                                      | incont. at age<br>34y                                                                                                | none                                          | none            | none           |
| <b>others</b>                                            | hyperopia &<br>regular school,<br>problems with<br>typography and<br>slow working<br>pace | febrile seizures<br>(3y), episodes of<br>generalized<br>myoclonus and<br>nocturnal<br>agitation (31y),<br>EEG normal | none                                          | none            | none           |
| <b>Neurophysiology</b>                                   | F10                                                                                       | F11                                                                                                                  | F12-1                                         | F12-2           | F12-3          |
| <b>MEPs (UL/LL)</b>                                      | n.d.                                                                                      | n.d.                                                                                                                 | n.d.                                          | n.d.            | n.d.           |
| <b>SEPs (UL/LL)</b>                                      | n.d.                                                                                      | prol.(c.c.)/ absent                                                                                                  | normal/normal                                 | n.d.            | n.d.           |
| <b>VEPs</b>                                              | n.d.                                                                                      | prol.                                                                                                                | n.d.                                          | n.d.            | n.d.           |
| <b>BAEPs</b>                                             | n.d.                                                                                      | normal                                                                                                               | n.d.                                          | n.d.            | n.d.           |
| <b>EMG</b>                                               | n.d.                                                                                      | normal                                                                                                               | normal                                        | n.d.            | n.d.           |
| <b>Nerve conduction studies</b>                          | n.d.                                                                                      | normal                                                                                                               | normal                                        | n.d.            | n.d.           |
| <b>MRI</b>                                               | F10                                                                                       | F11                                                                                                                  | F12-1                                         | F12-2           | F12-3          |
| <b>year of imaging / age</b>                             | 2015 / 7y                                                                                 | 2014 / 33y                                                                                                           | 2015 / 9y                                     | no images       | no images      |
| <b>thin corpus callosum</b>                              | -                                                                                         | fronto-temp.,<br>mild parietal                                                                                       | -                                             |                 |                |
| <b>cerebral atrophy</b>                                  | -                                                                                         | fronto-temp.,<br>mild parietal                                                                                       | -                                             |                 |                |
| <b>cerebellar atrophy (hemispheres /vermis)</b>          | - / -                                                                                     | + / +                                                                                                                | mild / mild                                   |                 |                |
| <b>midbrain / pons atrophy (Am/AP in mm<sup>2</sup>)</b> | - (137) / + (354)                                                                         | + (81) / + (203)                                                                                                     | - (135) / +(305)                              |                 |                |
| <b>white matter changes</b>                              | periventr., most<br>prominent<br>parietal                                                 | periventr.                                                                                                           | periventr., most<br>prominent<br>parieto-occ. |                 |                |
| <b>globus pallidum hypointensity (T2 / T2*)</b>          | + / +                                                                                     | mild / mild                                                                                                          | + / mild                                      |                 |                |

| Family-#                                                 | F13                                 | F14                                               | F15                                           | F16                                            |
|----------------------------------------------------------|-------------------------------------|---------------------------------------------------|-----------------------------------------------|------------------------------------------------|
| ethnicity                                                | Spanish                             | Belgian                                           | Turkish                                       | Italian                                        |
| sex                                                      | f                                   | f                                                 | f                                             | m                                              |
| consanguinity                                            | -                                   | -                                                 | -                                             | -                                              |
| mutation                                                 | K262T (hom) <b>pat. UPD</b>         | E78K / A8Pfs*91                                   | H69Y (hom)                                    | E88* / P154C <i>de novo</i>                    |
| age at onset [y]                                         | 4                                   | 10                                                | 5,83                                          | 3,5                                            |
| age at wheelchair use [y]                                | 11                                  | 29                                                | -                                             | 5,5                                            |
| age at exam [y]                                          | 18                                  | 37                                                | 6,83                                          | 4,66                                           |
| cognitive deficits                                       | mild                                | moderate                                          | IQ 85 (7;6y)                                  | mild                                           |
| <b>progression CD</b>                                    | +                                   | +                                                 | +                                             | +                                              |
| <b>optic atrophy</b>                                     | +                                   | -                                                 | -                                             | -                                              |
| <b>saccadic smooth pursuit</b>                           | +                                   | +                                                 | -                                             | -                                              |
| <b>gaze evoked nystagmus</b>                             | -                                   | -                                                 | -                                             | -                                              |
| <b>slow horizontal prosaccades</b>                       | +                                   | +                                                 | -                                             | -                                              |
| <b>other oculom. disturb.</b>                            | exotropia                           | -                                                 | -                                             | -                                              |
| <b>dysarthria</b>                                        | pseudobulb. later anarthria         | cerebellar, later pseudobulbar                    | -                                             | moderate dysarthria                            |
| <b>dysphagia</b>                                         | + (PEG at 19y)                      | +                                                 | -                                             | +                                              |
| <b>spasticity (UL/LL)</b>                                | +/+                                 | +/++                                              | -/+                                           | +/++                                           |
| <b>weakness (UL/LL/T)</b>                                | +/+/head drop                       | -/-/+                                             | -/+/-                                         | +/++/n.a.                                      |
| <b>muscle atrophy (UL/LL)</b>                            | +/+                                 | none                                              | -/(+) triceps surae                           | -/+                                            |
| <b>incr. DTR</b>                                         | UL/LL                               | UL/LL                                             | LL                                            | UL/LL                                          |
| <b>extensor plantar response</b>                         | +                                   | +                                                 | +                                             | +                                              |
| <b>limb ataxia</b>                                       | UL/LL                               | UL/LL                                             | none                                          | UL/LL                                          |
| <b>extrapyramidal involvement</b>                        | dystonic posturing in upper limbs   | none                                              | none                                          | none                                           |
| <b>sensory deficits</b>                                  | none                                | none                                              | none                                          | none                                           |
| <b>urinary dysfunction</b>                               | incont.                             | none                                              | none                                          | none                                           |
| <b>rectal dysfunction</b>                                | incont.                             | none                                              | none                                          | none                                           |
| <b>others</b>                                            | none                                | none                                              | pes cavus                                     | none                                           |
| <b>Neurophysiology</b>                                   | F13                                 | F14                                               | F15                                           | F16                                            |
| <b>MEPs (UL/LL)</b>                                      | normal                              | n.d.                                              | n.d.                                          | normal                                         |
| <b>SEPs (UL/LL)</b>                                      | normal                              | normal/normal                                     | n.d.                                          | normal                                         |
| <b>VEPs</b>                                              | normal                              | normal                                            | n.d.                                          | normal                                         |
| <b>BAEPs</b>                                             | normal                              | n.d.                                              | n.d.                                          | normal                                         |
| <b>EMG</b>                                               | normal                              | n.d.                                              | n.d.                                          | normal                                         |
| <b>Nerve conduction studies</b>                          | sensory conduction delayed          | n.d.                                              | n.d.                                          | normal                                         |
| <b>MRI</b>                                               | F13                                 | F14                                               | F15                                           | F16                                            |
| <b>year of imaging / age</b>                             | 2015 / 21y                          | 2015 / 37                                         | 2015/ 6;10                                    | 2015/4;10                                      |
| <b>thin corpus callosum</b>                              | global                              | + (mild global)                                   | -                                             | n.a.                                           |
| <b>cerebral atrophy</b>                                  | global                              | parietal                                          | + (dorsal body)                               | n.a.                                           |
| <b>cerebellar atrophy (hemispheres /vermis)</b>          | + / +                               | mild / -                                          | - / -                                         | n.a.                                           |
| <b>midbrain / pons atrophy (Am/Ap in mm<sup>2</sup>)</b> | + (97) / -(297)                     | - (114) / + (338)                                 | - (144) / + (343)                             | n.a.                                           |
| <b>white matter changes</b>                              | periventr., most prominent parietal | periventricular, most prominent parieto-occipital | mild periventricular, most prominent parietal | periventricular posterior and semioval centers |
| <b>globus pallidum hypointensity (T2 / T2*)</b>          | mild / mild                         | + / n.d.                                          | - / n.d.                                      | n.a./n.d.                                      |

**Abbreviations:** ‘+’ – sign/symptom present; ‘-’ – sign/symptom absent; absent: not measurable, Am: midbrain area, anarth.: anarthria, Ap: pons area, BAEPs: brainstem auditory evoked potentials, cc: central conduction, CD: cognitive deficit, cereb.: cerebellar, discrim.: discrimination, disturb.: disturbance, DTR: deep tendon reflexes, EMG: electromyography, fronto-temp.: fronto-temporal, gen: generalized., i.m. – information missing; incr.: increased, incont.: incontinence, LL: lower limb, mat.: maternal, MEPs: motor evoked potentials, most prom.: most prominent, n.a. – not applicable, NC: nerve conduction, oculom.: oculomotor, pallhyp: pallhypaesthesia, parieto-occ.: parieto-occipital, pat.: paternal, PNP: peripheral

neuropathy, periventr.: periventricular, prol.: prolonged latency, pseudob.: pseudobulbar, seg.: segmental, SEPs: sensory evoked potentials, temp.: temperature: T: trunc, T2 / T2\*: imaging contrast., UL: upper limb, UPD: uniparental disomy; VEP: visually evoked potentials; [y] years, age at onset = begin gait disturbance

**Supplementary Table 2: Overview of FA2H/SPG35 mutations with associated phenotypes**

| <b>Allele 1</b>            | <b>Number of occurrences among 38 families (# affected)</b> | <b>Allele 2</b>            | <b>Number of occurrences among 38 families (# affected)</b> | <b>Phenotype</b>                                                                                                                                                                                              | <b>age of onset (gait problems)</b> | <b>Reference</b>                         |
|----------------------------|-------------------------------------------------------------|----------------------------|-------------------------------------------------------------|---------------------------------------------------------------------------------------------------------------------------------------------------------------------------------------------------------------|-------------------------------------|------------------------------------------|
| c.21delC, p.A8Pfs*91       | 3 (5)                                                       | c.21delC, p.A8Pfs*91       | 2 (4)                                                       | cHSP with initially only spasticity; in eldest patient at age 9 complicated by mild symptoms of dysarthria, altered eye motility and cognitive impairment; cerebellar atrophy on imaging                      | 4,5                                 | F12 this study                           |
| c.21delC, p.A8Pfs*91       | 3 (5)                                                       | c.232G>A, p.E78K           | 2 (2)                                                       | cHSP presenting at age 9 with progressive spasticity and ataxia as well as progressive cognitive decline of moderate severity at age 37, wheelchair dependence since age 29.                                  | 10                                  | F14 this study                           |
| c.21delC, p.A8Pfs*91       | 3 (5)                                                       | c.554G>A, p.T185*          | 1 (1)                                                       | cHSP with additional ataxia and hypomimia. No iron accumulation in MRI.                                                                                                                                       | 4                                   | (van de Warrenburg <i>et al.</i> , 2016) |
| c.101A>G, p.Y34C           | 1 (2)                                                       | c.620C>T, p.T207M          | 2 (3)                                                       | cHSP with progressive leg spasticity at age 32 and progressive dementia at age 40.                                                                                                                            | 32                                  | (Pensato <i>et al.</i> , 2014)           |
| c.103G>T, p.D35Y           | 2 (3)                                                       | c.103G>T, p.D35Y           | 2 (3)                                                       | cHSP with spastic paraplegia progressing to spastic tetraparesis, dystonia, mild cognitive deterioration, dysmetria, dysdiadochokinesis                                                                       | 4&6                                 | (Edvardson <i>et al.</i> , 2008)         |
| c.103G>T, p.D35Y           | 2 (3)                                                       | c.193C>T, p.P65S           | 1 (1)                                                       | cHSP with spastic paraplegia, cerebellar eye signs, EEG abnormalities without epilepsy, MEP lower limbs prolonged, normal SEP                                                                                 | 6                                   | (Mari <i>et al.</i> , 2018)              |
| c.131C>A, p.P44Q           | 1 (1)                                                       | c.131C>A, p.P44Q           | 1 (1)                                                       | cHSP with spastic paraplegia progressing to spastic tetraparesis, with cerebellar ataxia, exotropia, dysphagia, rigor and no cognitive decline.                                                               | 4                                   | F8 - (Soehn* <i>et al.</i> , 2016))      |
| c.133G>T, p.G45W           | 1 (1)                                                       | c.133G>T, p.G45W           | 1 (1)                                                       | cHSP with spastic paraplegia and mild upper limb spasticity, mild cognitive progressive impairment.                                                                                                           | 4,5                                 | F10 this study                           |
| c.137G>A, p.G46D           | 1 (2)                                                       | c.137G>A, p.G46D           | 1 (2)                                                       | cHSP with moderate cognitive impairment (IQ = 51), mild ophthalmoparesis in the vertical gaze, spastic gait and mild paraspasticity.                                                                          | 4                                   | (Pensato <i>et al.</i> , 2014)           |
| c.157_174del, p.R53_I58del | 1 (1)                                                       | c.157_174del, p.R53_I58del | 1 (1)                                                       | cHSP with initial presentation being progressive balance problems and toe walking. Spastic quadriplegia was present on examination, along with early bladder problems, dysarthria, dysphagia and limb ataxia. | 6                                   | (Kara <i>et al.</i> , 2016)              |

|                                                           |       |                               |       |                                                                                                                                                                                                                                                               |         |                               |
|-----------------------------------------------------------|-------|-------------------------------|-------|---------------------------------------------------------------------------------------------------------------------------------------------------------------------------------------------------------------------------------------------------------------|---------|-------------------------------|
| c.159_176del,<br>p.R53_I58del                             | 1 (4) | c.159_176del,<br>p.R53_I58del | 1 (4) | cHSP with spastic paraplegia, possible dystonia, dysarthria progressing to anarthria, generalized seizures, mild cognitive decline, no cerebellar signs, bilateral optic atrophy, ophthalmoplegia with markedly reduced upgaze, dystonic upper limb movements | 4       | (Dick <i>et al.</i> , 2010)   |
| c.160_169del,<br>p.A54Tfs*42                              | 2 (2) | c.160_169del,<br>p.A54Tfs*42  | 2 (2) | cHSP with spastic paraplegia progressing to spastic tetraparesis, loss of ambulation, exotropia, dysphagia and severe cognitive decline.                                                                                                                      | 3       | F4                            |
| c.160_169del,<br>p.A54Tfs*42                              | 2 (2) | c.503_506del,<br>p.V168Gfs*70 | 1 (1) | cHSP with spastic ataxia and LL dystonia progressing to spastic tetraparesis leading to loss of ambulation at 10y, progressive cognitive decline, anarthria and PEG-fed at 34y, state of prolonged survival                                                   | 3       | F11<br>this study             |
| c.205C>T,<br>p.H69Y                                       | 1 (1) | c.205C>T,<br>p.H69Y           |       | cHSP with spastic paraplegia and cognitive deficit (IQ 85 at 7;6 yrs)                                                                                                                                                                                         | 5       | F15<br>this study             |
| c.209C>T,<br>p.S70L                                       | 1 (1) | c.968C>T,<br>p.P323L          | 2 (2) | cHSP with spastic paraplegia, loss of oromotor control with mild dysphagia and progressive hypophonia and bradylalia, mild cognitive decline, mild upper limb spasticity                                                                                      | 3       | (Rupps <i>et al.</i> , 2013)  |
| c.230T>G,<br>p.L77R                                       | 1 (1) | c.230T>G,<br>p.L77R           | 1 (1) | cHSP with spastic paraplegia progressing to tetraspasticity, dysarthria, cerebellar signs, exotropia, abnormal ocular motility, epilepsy, ataxia, MCI                                                                                                         | 4       | (Liao <i>et al.</i> , 2014)   |
| c.232G>A,<br>p.E78K                                       | 2 (2) | c.956A>G,<br>p.H319R          | 1 (1) | cHSP with spastic paraplegia progressing to spastic tetraparesis, MCI, exotropia and dysarthria                                                                                                                                                               | 20      | F9<br>this study              |
| c.262G>T,<br>p.E88*                                       | 1 (1) | c.460C>T,<br>p.R154C          | 3 (5) | cHSP with spastic tetraplegia, dysphagia, dysarthria, limb ataxia, dysphagia, cognitive deficit with progressive cognitive decline                                                                                                                            | 3       | F16<br>this study             |
| c.270+3A>T, del<br>ex 2-7                                 | 1 (2) | c.270+3A>T, del<br>ex 2-7     | 1 (2) | cHSP with spastic paraplegia leading to tetraspasticity, cerebellar signs, optic atrophy, dysarthria leading to anarthria, cognitive decline, generalized seizures                                                                                            | 4&7     | (Garone <i>et al.</i> , 2011) |
| c.340_363del24,<br>p.F114_K121del<br>and<br>c.363+1_8del8 | 1 (1) | c.1055C>T,<br>p.T352I         | 1 (1) | cHSP with progressive spastic paraplegia, strabism with surgery, mild intellectual disability (Full Scale IQ, 70), EMG with chronic denervation in the distal muscles of the lower limbs<br>(3 mutations described in one patient)                            | 9       | (Mari <i>et al.</i> , 2018)   |
| c.388C>T,<br>p.L130F                                      | 1 (2) | c.506+6C>G, del<br>ex3        | 1 (2) | cHSP with spastic paraparesis, horizontal nystagmus, behavioral disturbances, mild dysarthria, dysphagia, urinary dysfunction, hearing loss, extrapyramidal                                                                                                   | 10 & 17 | (Liao <i>et al.</i> , 2014)   |

|                            |       |                            |       |                                                                                                                                                                                                                                                                              |            |                                    |
|----------------------------|-------|----------------------------|-------|------------------------------------------------------------------------------------------------------------------------------------------------------------------------------------------------------------------------------------------------------------------------------|------------|------------------------------------|
| c.443C>T,<br>p.P148L       | 1 (2) | c.443C>T,<br>p.P148L       | 1 (2) | cHSP with with spastic paraparesis, gait ataxia, cognitive decline, optic atrophy and vertical gaze palsy                                                                                                                                                                    | 4          | F3<br>this study                   |
| c.460C>T,<br>p.R154C       | 3 (5) | c.460C>T,<br>p.R154C       | 3 (5) | cHSP with spastic paraplegia progressing to spastic tetraparesis, dysmetria, exotropia, progr, dysarthria leading up to anarthria, xeroderma, ataxia, asymmetric optic atrophy, lateral-beating nystagmus, acquired epilepsy                                                 | 4-5        | (Kruer <i>et al.</i> , 2010)       |
| c.460C>T,<br>p.R154C       | 3 (5) | c.620C>T,<br>p.T207M       | 3 (4) | cHSP with initial presentation being progressive balance problems and toe walking. Spastic quadriplegia was present on examination, along with early bladder problems, dysarthria, dysphagia and limb ataxia.                                                                | 22         | (Kara <i>et al.</i> , 2016)        |
| c.486G>C,<br>p.E162D       | 1 (1) | c.1051A>C,<br>p.S351R      | 1 (1) | cHSP with initial presentation being progressive balance problems and toe walking. Spastic quadriplegia was present on examination, along with early bladder problems, dysarthria, dysphagia and limb ataxia.                                                                | 3          | (Kara <i>et al.</i> , 2016)        |
| c.509A>G,<br>p.Y170C       | 1 (2) | c.509A>G,<br>p.Y170C       | 1 (2) | cHSP with spastic paraplegia, dysarthria, lateral beating nystagmus, dysmetria, mild cognitive decline, behavioral disturbances                                                                                                                                              | 38 & 40    | (Tonelli <i>et al.</i> , 2012)     |
| c.509_510delAC,<br>p.Y170* | 2 (4) | c.509_510delAC,<br>p.Y170* | 2 (4) | cHSP, seizures at age 2, spastic tetraparesis at age 4, progressive ataxia, and dystonia, bradyphasia and dysarthria, MCI, bladder incontinence, exotropia; brother with no seizures                                                                                         | 3&4        | (Kruer <i>et al.</i> , 2010)       |
| c.509_510delAC,<br>p.Y170* | 2 (4) | c.509_510delAC,<br>p.Y170* | 2 (4) | cHSP with spastic paraplegia. #1: dysarthric speech and head and hand tremor and difficulty chewing, head drop and bilateral hand muscle atrophy + gastrocnemius atrophy. #2: dropped head, truncal hypotonia, bilateral atrophy of the lower extremity muscles, and tremor. | 3&4        | (Donkervoort <i>et al.</i> , 2014) |
| c.510_511delCA,<br>p.Y170* | 1 (1) | c.510_511delCA,<br>p.Y170* | 1 (1) | cHSP with spastic paraplegia progressing to spastic tetraparesis, cerebellar dysarthria, progressive MCI, reduced touch sensation, resting tremor.                                                                                                                           | 4          | F5<br>this study                   |
| c.527G>A,<br>p.W176*       | 1 (1) | c.527G>A,<br>p.W176*       | 1 (1) | cHSP with spastic paraplegia progressing to spastic tetraparesis. Almost loss of ambulation. Moderate cognitive decline, exotropia, pseudobulbar dysarthria, truncal hypotonia.                                                                                              | 3          | F1 - (Soehn* <i>et al.</i> , 2016) |
| c.620C>T,<br>p.T207M       | 4 (6) | c.704G>A,<br>p.R235H       | 3 (4) | cHSP with progressive paraplegia                                                                                                                                                                                                                                             | child-hood | F6<br>this study                   |



|                                |       |                                                     |       |                                                                                                                                                                                                                                                                                                                                                                                                                              |       |                                        |
|--------------------------------|-------|-----------------------------------------------------|-------|------------------------------------------------------------------------------------------------------------------------------------------------------------------------------------------------------------------------------------------------------------------------------------------------------------------------------------------------------------------------------------------------------------------------------|-------|----------------------------------------|
| c.620C>T,<br>p.T207M           | 4 (6) | c.704G>A,<br>p.R235H                                | 3 (4) | cHSP with progressive paraplegia, bipolar II disorder, progressive dysarthria, progressive long term temporal disorientation and memory impairments, cerebellar ataxia, and dysphagia. & cHSP with progressive paraplegia, with progressive dysphagia and dysarthria, sphincter disturbances, cerebellar ataxia, and short- and long-term visuo-spatial and verbal memory impairment along with mild anxiety and depression. | 9&15  | (Magariello <i>et al.</i> , 2017)      |
| c.688G>A,<br>p.E230K           | 1 (2) | c.968C>A,<br>p.P323Q<br>(c.976G>A,<br>p.G326S: VUS) | 1 (2) | cHSP with spastic paraplegia leading to tetraspasticity, mild cerebellar dysfunction, cognitive decline, dysarthria progressive to anarthria, dystonia, epileptic seizures, neck weakness, urinary and fecal incontinence, nystagmus<br>(3 mutations described in two patients)                                                                                                                                              | 4&5   | (Cao <i>et al.</i> , 2013)             |
| c.703C>T,<br>p.R235C           | 1 (8) | c.703C>T,<br>p.R235C                                | 1 (8) | cHSP with paraspasticity (other family members) tetraspasticity, dysarthria, cognitive decline, some with epilepsy                                                                                                                                                                                                                                                                                                           | 6-11  | (Dick <i>et al.</i> , 2010)            |
| c.704G>A,<br>p.R235H           | 2 (2) | c.859T>C,<br>p.C287R                                | 1 (1) | cHSP with tetraspasticity, generalized dystonia, MCI, focal epilepsy, exotropia, anarthria and dysphagia.                                                                                                                                                                                                                                                                                                                    | 2,5   | F7<br>this study                       |
| c.782_783insA,<br>p.H261Qfs*52 | 1 (1) | c.798C>G,<br>p.D266E                                | 1 (1) | cHSP with initial presentation being progressive balance problems and toe walking. Spastic quadriplegia was present on examination, along with early bladder problems, dysarthria, dysphagia and limb ataxia.                                                                                                                                                                                                                | 4     | (Kara <i>et al.</i> , 2016)            |
| c.785A>C,<br>p.K262T           | 2 (3) | c.785A>C,<br>p.K262T                                | 1 (3) | cHSP with spastic paraplegia leading to tetraspasticity. Progressive dysarthria to anarthria. Optic atrophy & teeth disposition alteration. Early cerebellar dysfunction, upper limb dystonia and MCI.                                                                                                                                                                                                                       | 4     | F13 -<br>(Soehn* <i>et al.</i> , 2016) |
| c.786+1G>A, del<br>ex 5-6      | 2 (5) | c.786+1G>A, del<br>ex 5-6                           | 2 (5) | cHSP with spastic paraplegia progressing to spastic tetraparesis, dystonia, mild cognitive decline, dysmetria, dysdiadochokinesis, some with seizures                                                                                                                                                                                                                                                                        | 4,5-6 | (Edvardson <i>et al.</i> , 2008)       |
| c.805C>T,<br>p.R269C           | 1 (1) | c.1501A>G,<br>p.S351G                               | 1 (1) | cHSP with progressive spastic gait, diffuse muscular hypotonia, club foot, EEG abnormalities without epilepsy, normal electrophysiology.                                                                                                                                                                                                                                                                                     | 4     | (Mari <i>et al.</i> , 2018)            |
| c.806G>A,<br>p.R269H           | 1 (2) | c.806G>A,<br>p.R269H                                | 1 (2) | cHSP with spastic paraplegia, ataxia, cognitive decline, incontinence, bilateral optic atrophy.                                                                                                                                                                                                                                                                                                                              | 12-16 | (Marelli <i>et al.</i> , 2015)         |

|                         |       |                       |       |                                                                                                                                                                                                                                                         |   |                                |
|-------------------------|-------|-----------------------|-------|---------------------------------------------------------------------------------------------------------------------------------------------------------------------------------------------------------------------------------------------------------|---|--------------------------------|
| c.908G>T,<br>p.G303V    | 1 (1) | c.968C>T,<br>p.P323L  | 2 (2) | cHSP with spastic paraplegia leading to tetraspasticity with loss of ambulation, progressive moderate to severe cognitive impairment, exotropia, cerebellar dysarthria, dysphagia, rigor, generalized dystonia, sensory involvement and focal epilepsy. | 3 | F2<br>this study               |
| c.1006C>A,<br>p.H336N   | 1 (3) | c.1006C>A,<br>p.H336N | 1 (3) | cHSP with progressive spastic paraplegia and ataxia without cognitive decline.                                                                                                                                                                          | 4 | (Marelli <i>et al.</i> , 2015) |
| 28kb del, del ex<br>3-7 | 1 (1) | c.707T>C,<br>p.F236S  | 1 (1) | cHSP with spastic paraplegia dysarthria, neck weakness, no seizures, mild dysmetria and ataxia, no dystonia, mild cognitive decline                                                                                                                     | 3 | (Pierson <i>et al.</i> , 2012) |

## References

- Cao L, Huang XJ, Chen CJ, Chen SD. A rare family with Hereditary Spastic Paraplegia Type 35 due to novel FA2H mutations: a case report with literature review. *J Neurol Sci* 2013; 329(1-2): 1-5.
- Dick KJ, Eckhardt M, Paisan-Ruiz C, Alshehhi AA, Proukakis C, Sibtain NA, *et al.* Mutation of FA2H underlies a complicated form of hereditary spastic paraplegia (SPG35). *Hum Mutat* 2010; 31(4): E1251-60.
- Donkervoort S, Dastgir J, Hu Y, Zein WM, Marks H, Blackstone C, *et al.* Phenotypic variability of a likely FA2H founder mutation in a family with complicated hereditary spastic paraplegia. *Clinical Genetics* 2014; 85(4): 393-5.
- Edvardson S, Hama H, Shaag A, Gomori JM, Berger I, Soffer D, *et al.* Mutations in the Fatty Acid 2-Hydroxylase Gene Are Associated with Leukodystrophy with Spastic Paraparesis and Dystonia. *The American Journal of Human Genetics* 2008; 83(5): 643-8.
- Garone C, Pippucci T, Cordelli DM, Zuntini R, Castegnaro G, Marconi C, *et al.* FA2H-related disorders: a novel c.270+3A>T splice-site mutation leads to a complex neurodegenerative phenotype. *Developmental Medicine & Child Neurology* 2011; 53(10): 958-61.
- Kara E, Tucci A, Manzoni C, Lynch DS, Elpidorou M, Bettencourt C, *et al.* Genetic and phenotypic characterization of complex hereditary spastic paraplegia. *Brain* 2016: aww111.
- Kruer MC, Paisán-Ruiz C, Boddaert N, Yoon MY, Hama H, Gregory A, *et al.* Defective FA2H leads to a novel form of neurodegeneration with brain iron accumulation (NBIA). *Annals of Neurology* 2010; 68(5): 611-8.
- Liao X, Luo Y, Zhan Z, Du J, Hu Z, Wang J, *et al.* SPG35 contributes to the second common subtype of AR-HSP in China: frequency analysis and functional characterization of FA2H gene mutations. *Clinical Genetics* 2014: n/a-n/a.
- Magariello A, Russo C, Citrigno L, Züchner S, Patitucci A, Mazzei R, *et al.* Exome sequencing reveals two FA2H mutations in a family with a complicated form of Hereditary Spastic Paraplegia and psychiatric impairments. 2017; 372: 347-9.
- Marelli C, Salih MA, Nguyen K, Mallaret M, Leboucq N, Hassan HH, *et al.* Cerebral Iron Accumulation Is Not a Major Feature of FA2H/SPG35. *Movement Disorders Clinical Practice* 2015; 2(1): 56-60.
- Mari F, Berti B, Romano A, Baldacci J, Rizzi R, Alessandrì MG, *et al.* Clinical and neuroimaging features of autosomal recessive spastic paraplegia 35 (SPG35): case reports, new mutations, and brief literature review. *neurogenetics* 2018; 19(2): 123-30.
- Pensato V, Castellotti B, Gellera C, Pareyson D, Ciano C, Nanetti L, *et al.* Overlapping phenotypes in complex spastic paraplegias SPG11, SPG15, SPG35 and SPG48. *Brain* 2014.

Pierson TM, Simeonov DR, Sincan M, Adams DA, Markello T, Golas G, *et al.* Exome sequencing and SNP analysis detect novel compound heterozygosity in fatty acid hydroxylase-associated neurodegeneration. *Eur J Hum Genet* 2012; 20(4): 476-9.

Rupps R, Hukin J, Balicki M, Mercimek-Mahmutoglu S, Rolfs A, Dias C. Novel Mutations in FA2H-Associated Neurodegeneration: An Underrecognized Condition? *Journal of Child Neurology* 2013; 28(11): 1500-4.

Soehn\* AS, Rattay\* TW, Beck-Wodl S, Schaferhoff K, Monk D, Dobler-Neumann M, *et al.* Uniparental disomy of chromosome 16 unmasks recessive mutations of FA2H/SPG35 in 4 families. *Neurology* 2016; 87(2): 186-91.

Tonelli A, D'Angelo MG, Arrigoni F, Brighina E, Arnoldi A, Citterio A, *et al.* Atypical adult onset complicated spastic paraparesis with thin corpus callosum in two patients carrying a novel FA2H mutation. *European Journal of Neurology* 2012; 19(11): e127-e9.

van de Warrenburg BP, Schouten MI, de Bot ST, Vermeer S, Meijer R, Pennings M, *et al.* Clinical exome sequencing for cerebellar ataxia and spastic paraplegia uncovers novel gene–disease associations and unanticipated rare disorders. *European Journal of Human Genetics* 2016.

# Pedigrees of all SPG35 cases with segregation analysis and mutations identified

**family F1 - UPD**

c.[527G>A];[527G>A]  
p.[W176\*];[W176\*]

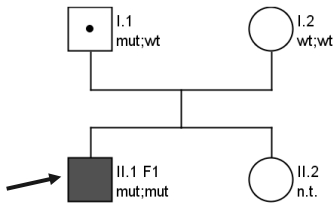

**family F2**

c.[908G>T];[968C>T]  
p.[G303V];[P323L]

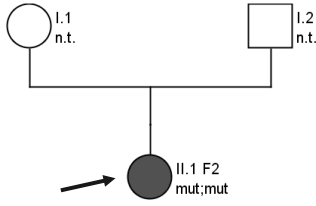

**family F3:**

c.[443C>T];[443C>T]  
p.[P148L];[P148L]

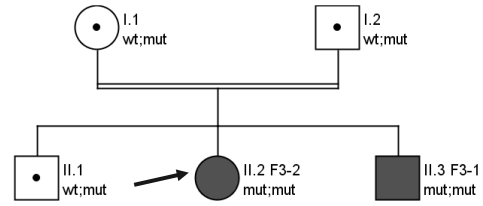

**family F4**

c.[160\_169del];[160\_169del]  
p.[A54Tfs\*42];[A54Tfs\*42]

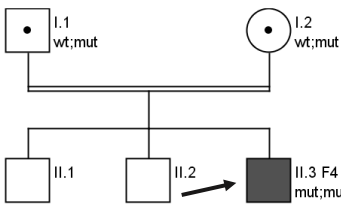

**family F5**

c.[510\_511delCA];[510\_511delCA]  
p.[pY170\*];[pY170\*]

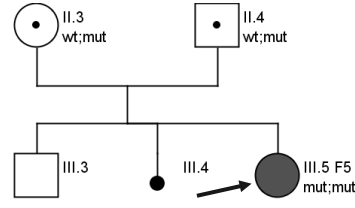

**family F6**

c.[620C>T];[704G>A]  
p.[T297M];[R235H]

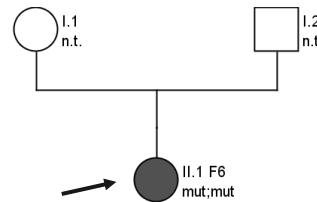

**family F7**

c.[704G>A];[859T>C]  
p.[R235H];[C287R]

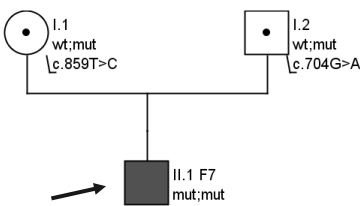

**family F8 - UPD**

c.[131C>A];[131C>A]  
p.[P44Q];[P44Q]

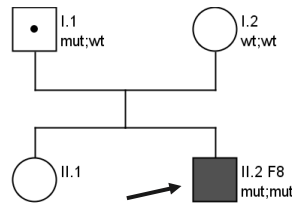

**family F9**

c.[232G>A];[956A>G]  
p.[E78K];[H319R]

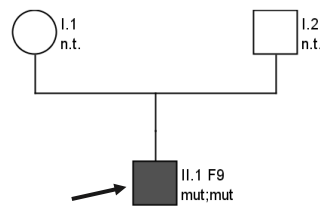

**family F10 - UPD**

c.[133G>T];[133G>T]  
p.[G45W];[G45W]

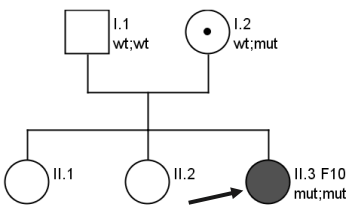

**family F11**

c.[160\_169del];[503\_506del]  
p.[A54Tfs\*42];[V168Gfs\*72]

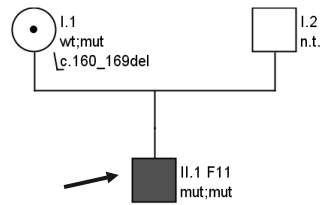

**family F12:**

c.[21delC];[21delC]  
p.[A8Pfs\*91];[A8Pfs\*91]

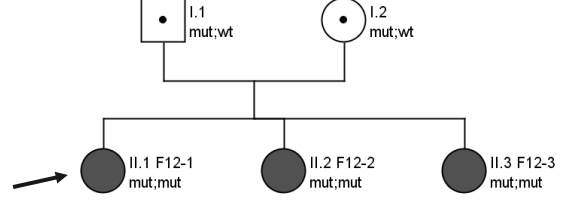

**family F13 - UPD**

c.[785A>C];[785A>C]  
p.[K262T];[K262T]

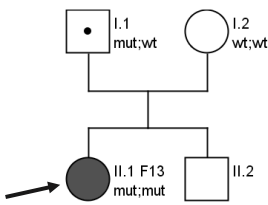

**family F14**

c.[21delC];[232G>A]  
p.[A8Pfs\*91];[E78K]

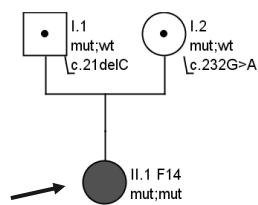

**family F15**

c.[205C>T];[205C>T]  
p.[H69Y];[H69Y]

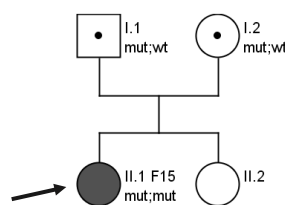

**family F16**

c.[262G>T];[460C>T]  
p.[E88\*];[P154C]

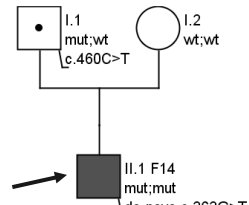

**Supplementary Figure 1: Pedigrees and segregation analysis of all 16 families**
